# Supplementary material for: Elevated levels of Wnt signaling disrupt thymus morphogenesis and function
Source: PubMed Central journal article supplement (PMC5429746; doi:10.1038/s41598-017-00842-0), 2017-04-11
Supplement: 41598_2017_842_MOESM1_ESM.pdf [file 41598_2017_842_MOESM1_ESM.pdf]

**Supplementary information for**

**Elevated levels of Wnt signaling disrupt thymus morphogenesis and function**

Jeremy B. Swann, Christiane Happe and Thomas Boehm

Figure S1.

A Wildtype

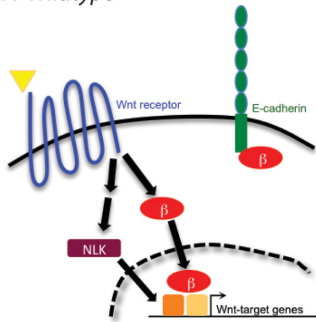

B *NLK*<sup>-/-</sup>

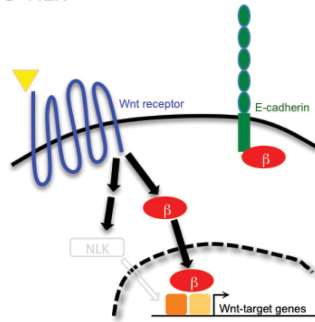

C *Ctnnb1*<sup>fl/fl</sup>; *Foxn1*::*Cre*<sup>+</sup>

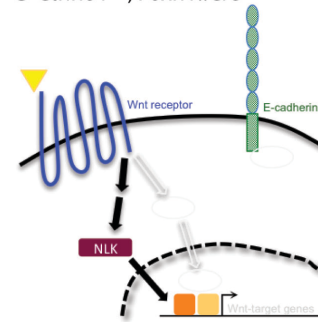

D *Foxn1*::*β-catenin*<sup>+</sup>

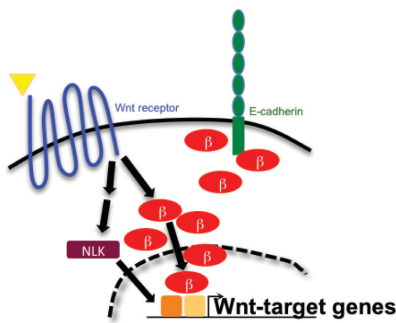

E *Cdh1*<sup>fl/fl</sup>; *Foxn1*::*Cre*<sup>+</sup>

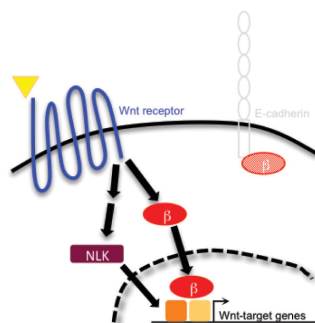

F *Cdh1*<sup>fl/fl</sup>; *Foxn1*::*Cre*<sup>+</sup>; *Foxn1*::*β-catenin*<sup>+</sup>

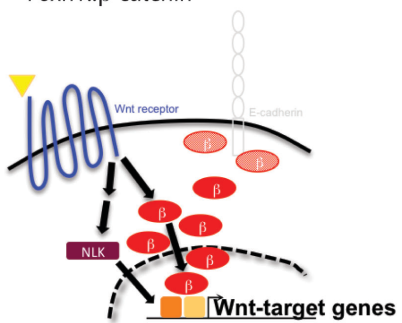

G *Foxn1*::*Wnt4*<sup>+</sup>

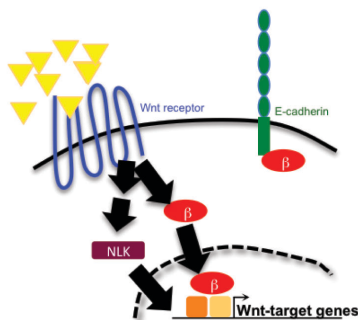

H *Ctnnb1*<sup>fl/fl</sup>; *Foxn1*::*Cre*<sup>+</sup>; *Foxn1*::*Wnt4*<sup>+</sup>

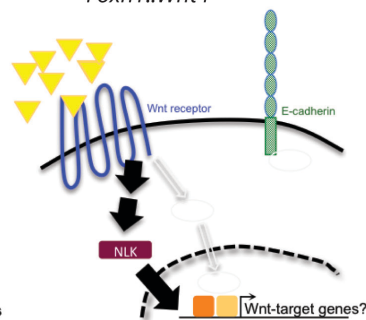

I *NLK*<sup>-/-</sup>; *Foxn1*::*Cre*<sup>+</sup>; *Foxn1*::*Wnt4*<sup>+</sup>

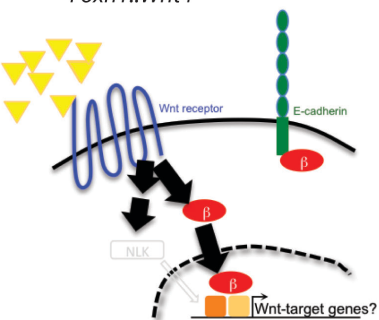

**Supplementary Figure 1. Schematic depiction of the various genetic models used in the study.** (A) A wild-type TEC is depicted, where binding of Wnts (yellow triangle) to a Wnt-receptor expressed at the surface initiates  $\beta$ -catenin-dependent signaling by stabilisation of  $\beta$ -catenin (red ovals), which translocates to the nucleus, where it modulates expression of target genes via interactions with transcriptional co-activators (orange boxes). Additionally, Wnt binding can activate signaling via NLK (purple rectangle), which can modulate transcriptional output by phosphorylating downstream effectors. E-cadherin is present at the TEC surface, and interacts with  $\beta$ -catenin via its intracellular tail to maintain intracellular adhesive interactions. (B) Depicts the loss of

NLK-dependent signaling in *Nlk*-deficient mice. (C) Loss of  $\beta$ -catenin-dependent signaling in  $\beta$ -catenin-deficient mice is shown; note that in this situation, although E-cadherin is still expressed, adhesive functions are compromised. (D) Depicts the overexpression of stabilised  $\beta$ -catenin, resulting in enhanced expression of Wnt-target genes, and potential modification of E-cadherin-mediated intracellular adhesion. (E) E-cadherin-deficiency is depicted; in this situation the fate of the  $\beta$ -catenin that would normally be associated with E-cadherin at the cell surface is unclear, although it is likely degraded by the proteasome. (F) The combined loss of E-cadherin and overexpression of stabilised  $\beta$ -catenin is depicted. (G) Indicates the enhanced Wnt-signaling induced by overexpression of Wnt4. (H - I) Depict the overexpression of Wnt4 in the absence of  $\beta$ -catenin or NLK respectively. Note that in (G-H), in addition to its effect on TECs, the overexpressed Wnt4 can potentially exert paracrine effects on other cells, such as those forming the parathyroid and the thyroid.



Figure S2.

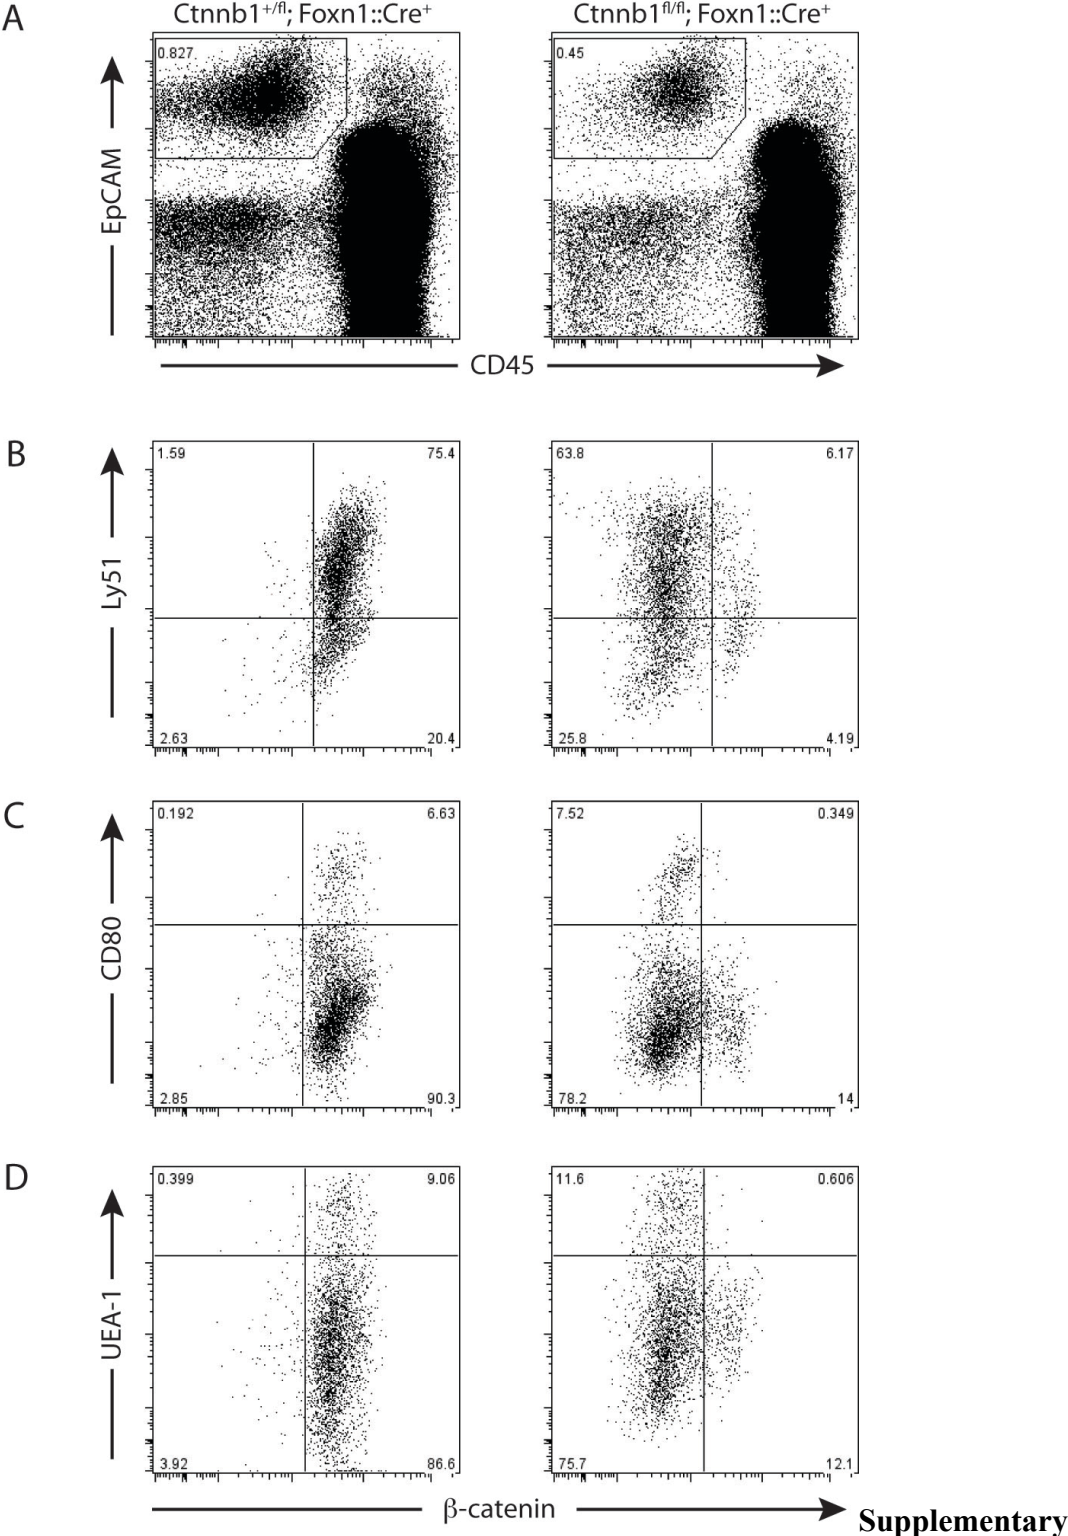

**Figure 2. Flow cytometric analysis of TEC subsets in newborn  $\beta$ -catenin-deficient thyme.** (A) Representative gating on CD45<sup>+</sup>EpCAM<sup>+</sup> TECs is shown. (B - D) Staining for Ly51 (B), CD80 (C) or UEA-1 (D) in combination with intracellular  $\beta$ -catenin staining is depicted. Plots B - D are gated on TECs.

Figure S3.

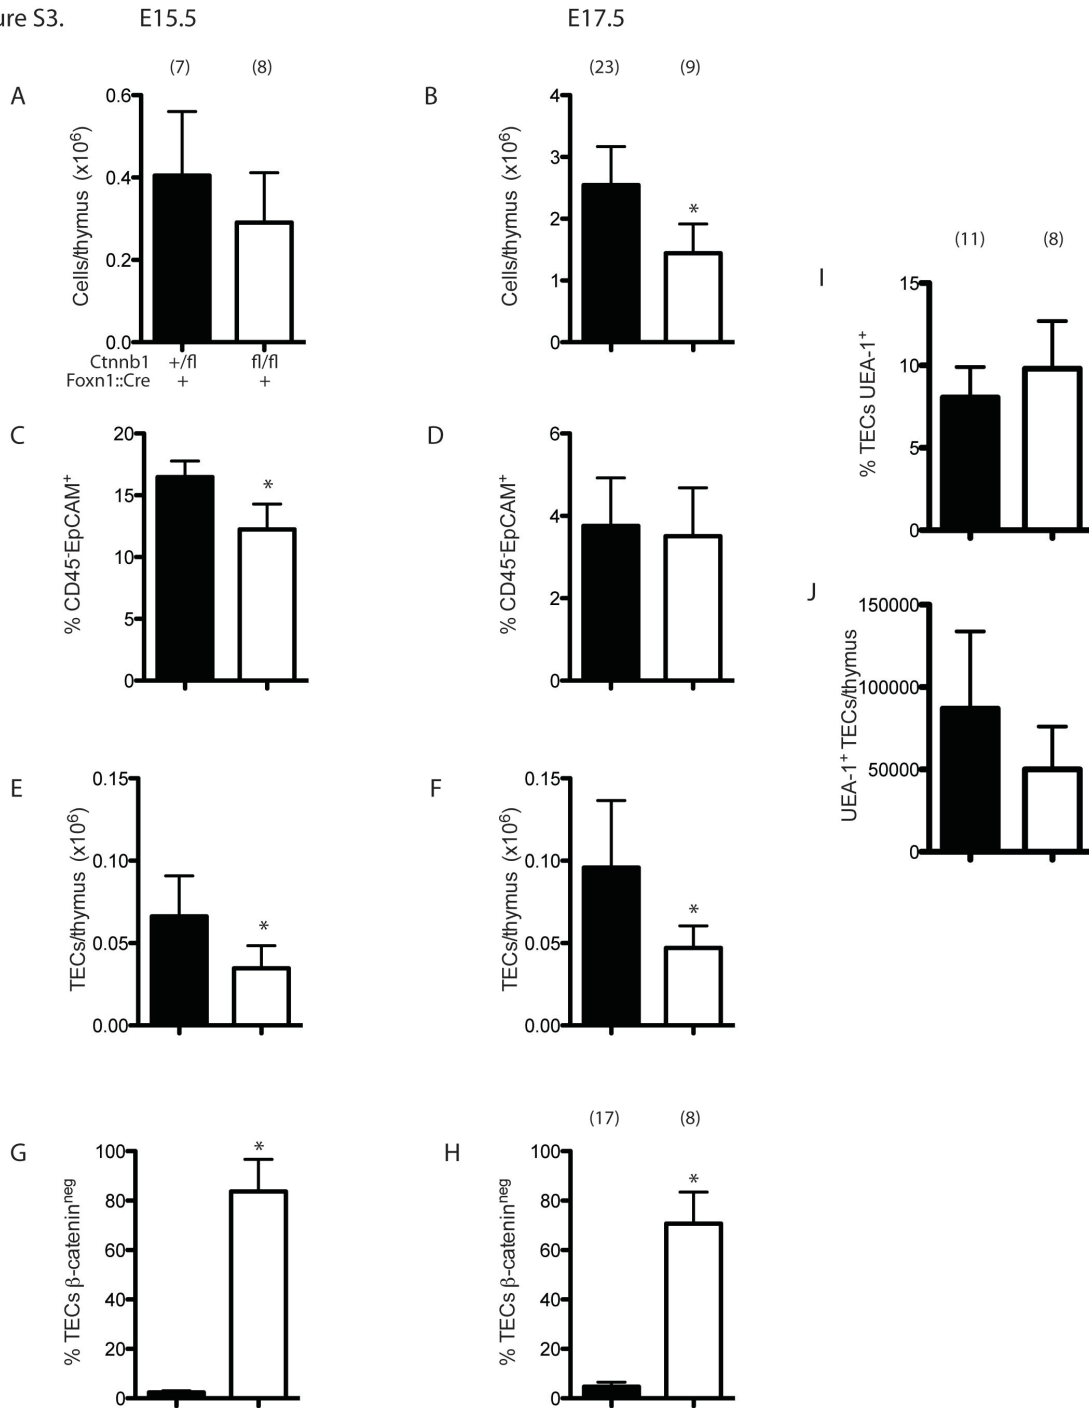

**Supplementary Figure 3. Flow cytometric analysis of embryonic,  $\beta$ -catenin-deficient thymi.** Thymi were isolated from E15.5 (A, C, E & G) or E17.5 (B, D, F, H - J) embryos and analysed for total cellularity (A & B), TEC proportions (C & D), TEC number (E &

F) and  $\beta$ -catenin deletion efficiency (G & H). The proportion (I) and number (J) of UEA-1<sup>+</sup> TECs was also analysed at E17.5.



Figure S4.

A

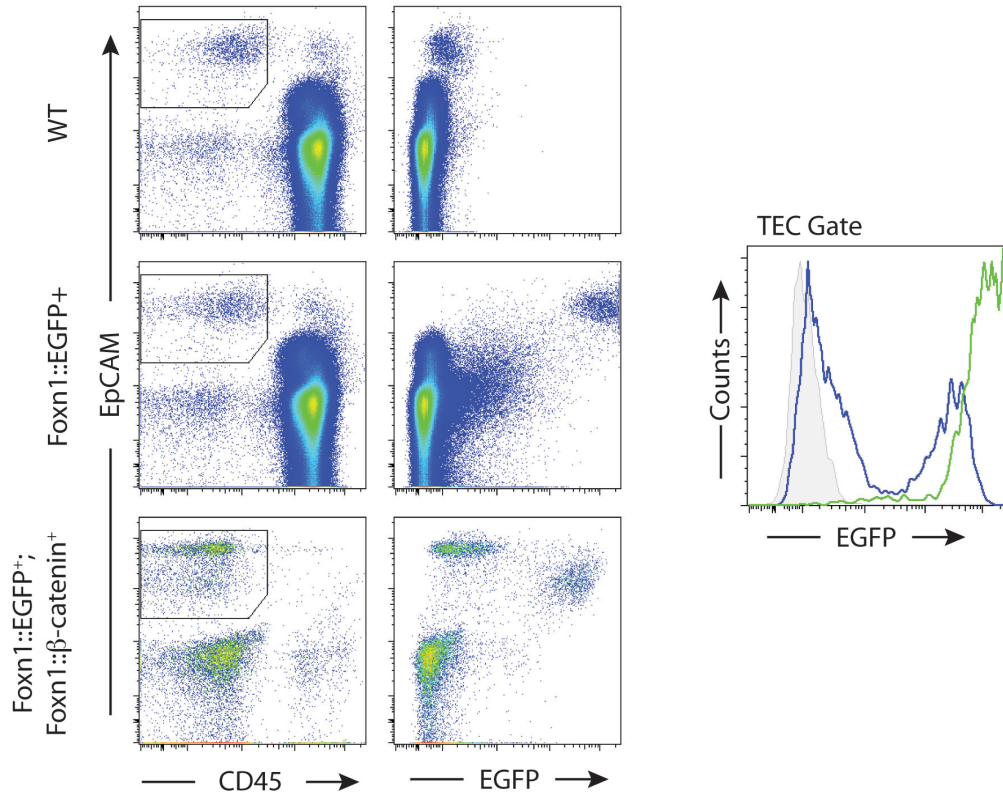

B

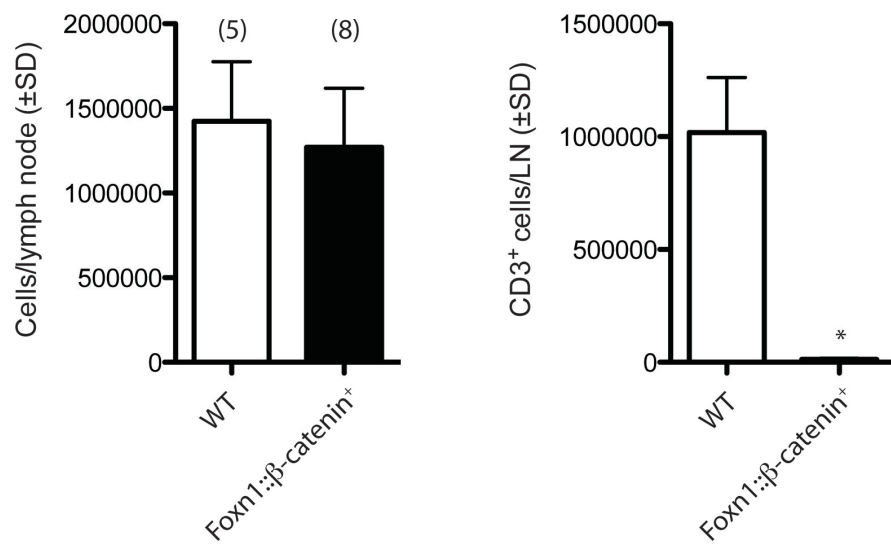

**Supplementary Figure S4. Flow cytometric analysis of  $\beta$ -catenin-transgenic mice.**

(A) Thymi were harvested from three-day old wild-type (WT), *Foxn1::EGFP* or *Foxn1::EGFP;Foxn1:: $\beta$ -catenin*-transgenic mice and analysed by flow cytometry. *Foxn1::EGFP;Foxn1:: $\beta$ -catenin*-double transgenic lobes were collected by dissecting the cervical region under UV-illumination to identify EGFP-expressing tissue. After isolation, thymic tissue was digested with collagenase/dispase to generate a single cell suspension, and stained with CD45 and EpCAM to identify TECs. Representative TEC gates are depicted in the left column; EGFP expression relative to EpCAM is depicted in the right column. EGFP expression by gated TEC populations is depicted as a histogram overlay; the blue tracing represents EGFP expression by *Foxn1::EGFP; Foxn1:: $\beta$ -catenin* double-transgenic TECs, compared to TECs from *Foxn1::EGFP* single-transgenic (in green), or WT mice (grey). It should be noted that due to the failed separation of the thymus and parathyroid in  $\beta$ -catenin-transgenic mice, some of the CD45<sup>-</sup>EpCAM<sup>+</sup> epithelial cells could potentially be derived from thymus-associated parathyroid tissue. Nevertheless, EGFP expression is reduced in double-transgenic mice compared to *Foxn1::EGFP* single-transgenic mice, indicating a reduction in *Foxn1* promoter activity. (B) Total cell counts, and numbers of CD3<sup>+</sup> cells in the peripheral lymph nodes of adult WT and  $\beta$ -catenin-transgenic mice are depicted as mean  $\pm$  SD.

Figure S5.

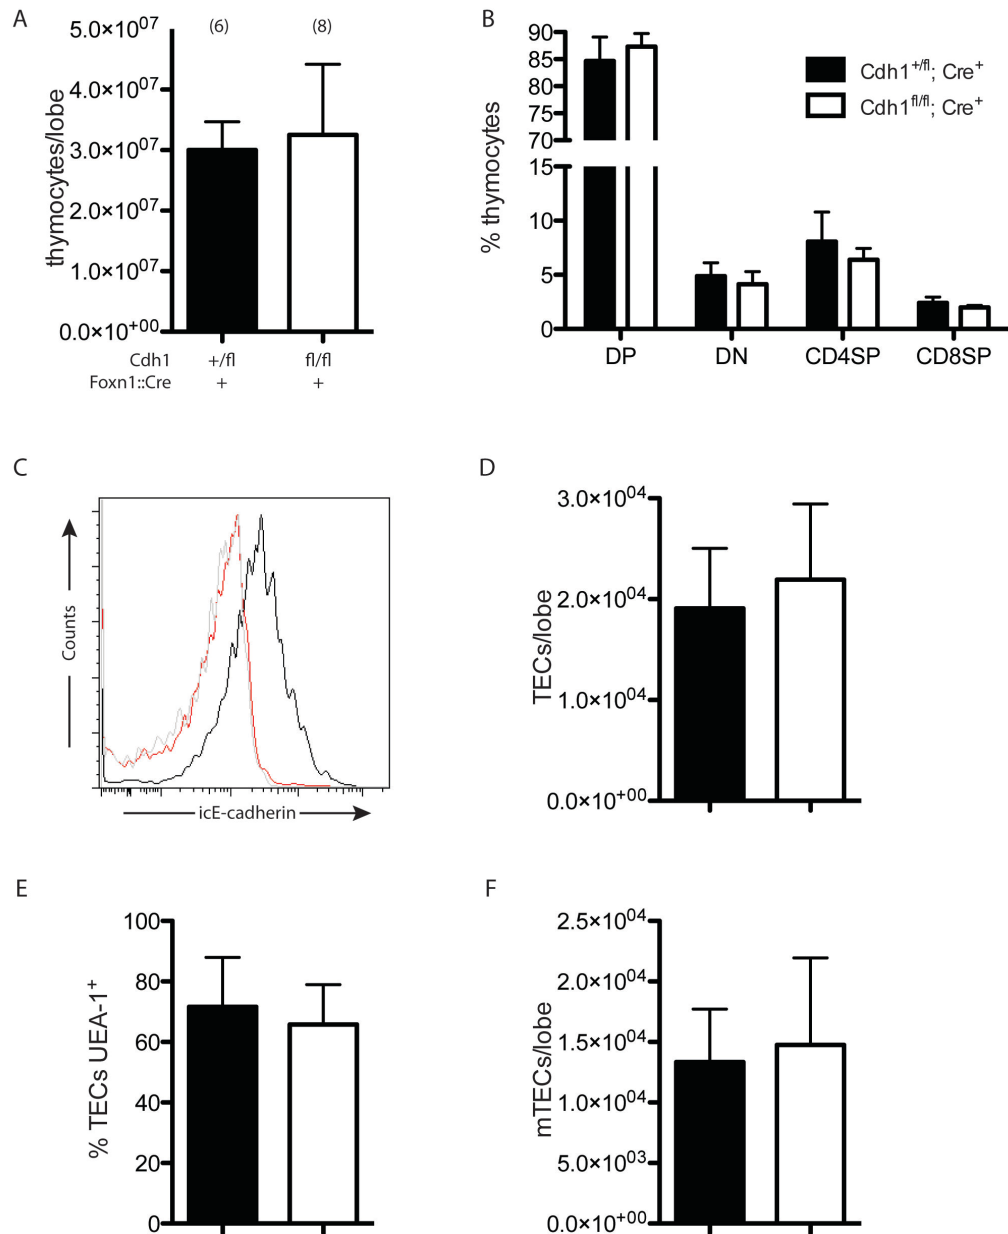

**Supplementary Figure 5. Flow cytometric analysis of adult E-cadherin-deficient mice.** (A) Thymocyte counts from 12-week old control and E-cadherin-deficient mice. (B) Proportions of thymocyte subsets at 12 weeks. (C) Intracellular staining for E-cadherin expressed by gated CD45<sup>+</sup>EpCAM<sup>+</sup> TECs derived from control (black tracing) or E-cadherin-deficient mice (red tracing), compared to isotype control staining (in grey). (D) Total TEC numbers. (E) Proportions of UEA-1<sup>+</sup> TECs. (F) Numbers of UEA-1<sup>+</sup> mTECs are shown. All column graphs depict the mean ± SD for control (black bars,

Cdh1<sup>+/fl</sup>; Foxn1::Cre<sup>+</sup> and E-cadherin-deficient (open bars, Cdh1<sup>fl/fl</sup>; Foxn1::Cre<sup>+</sup>) mice aged 12 weeks.

Figure S6.

A

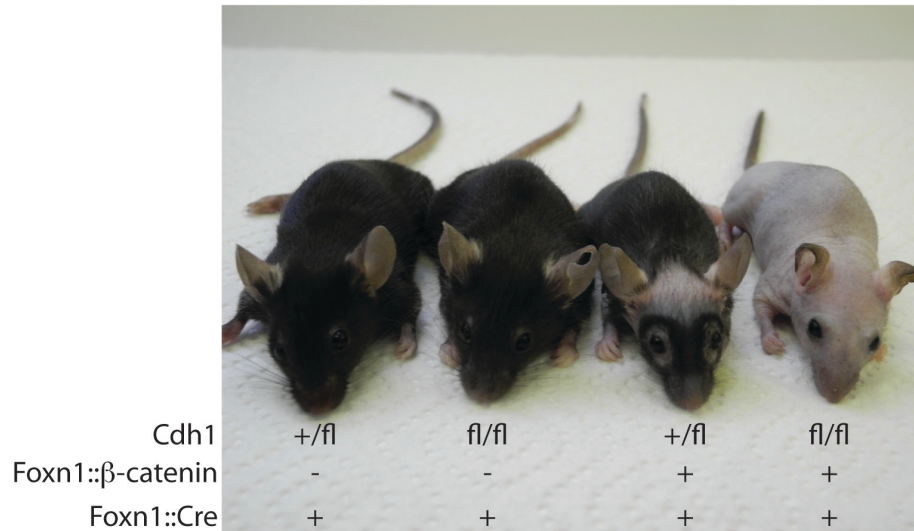

B

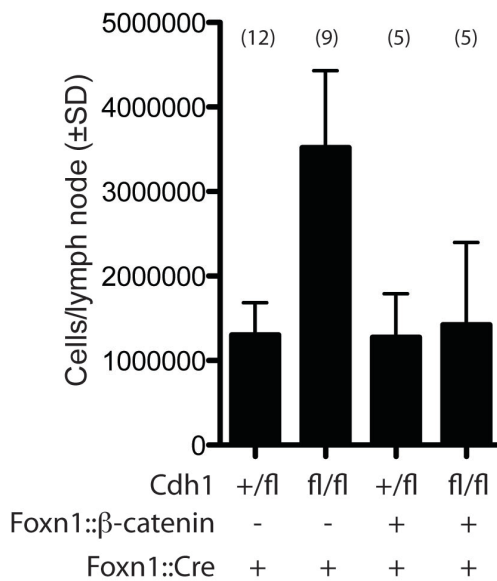

C

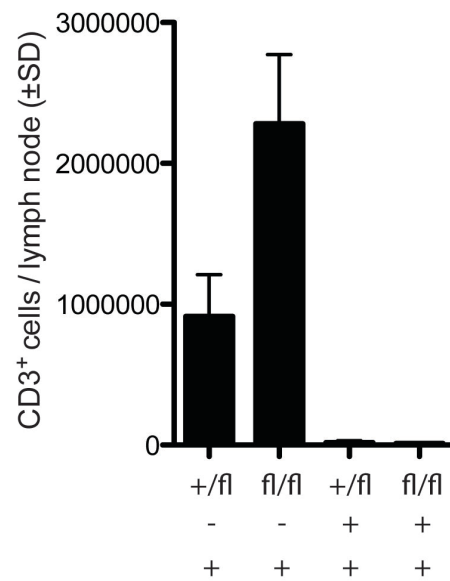

**Supplementary Figure 6. E-cadherin-deficiency fails to rescue T cell development in Foxn1::β-catenin-transgenic mice.** (A) Representative coat phenotypes are shown for the indicated genotypes. (B) The number of total cells/lymph node, and (C) Numbers of CD3<sup>+</sup> T cells/lymph node is shown for each genotype. Data was collected from 12-week old mice, and is presented as mean ± SD.

Figure S7.

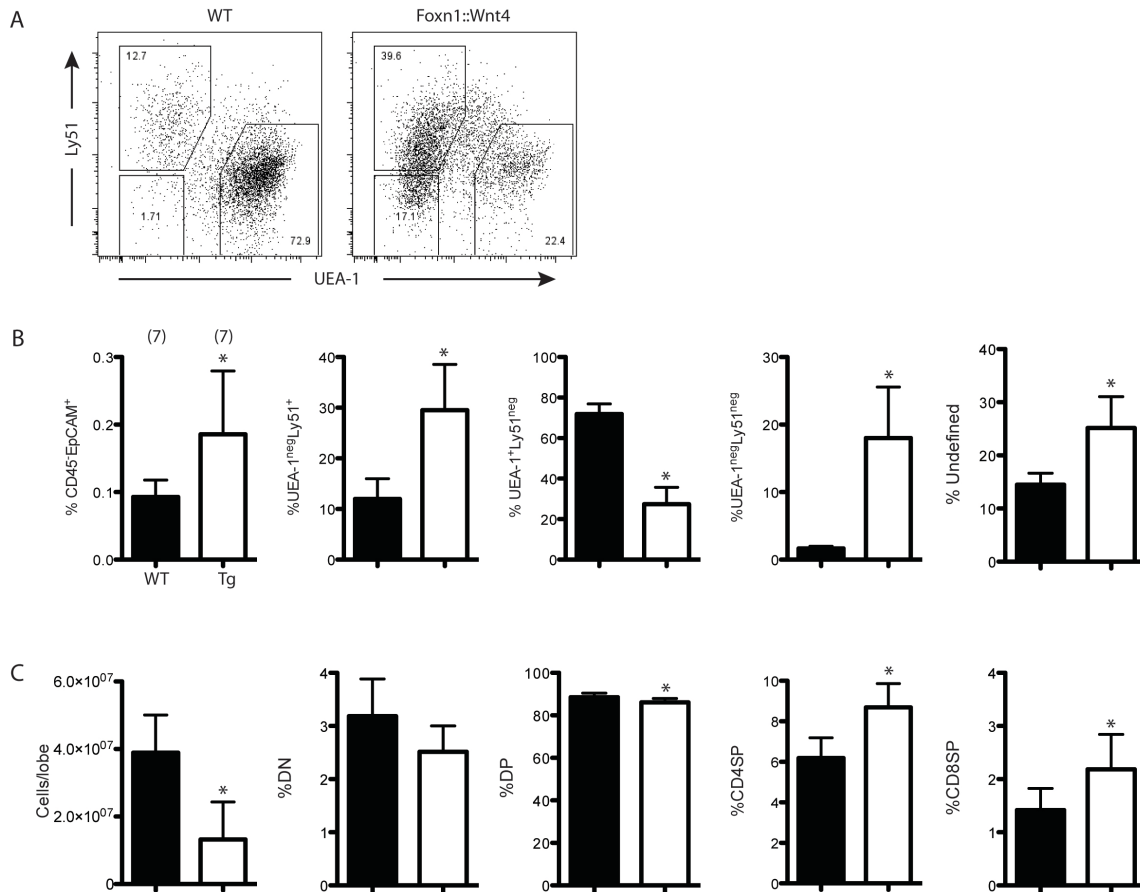

**Supplementary Figure 7. Thymus function in adult Foxn1::Wnt4-transgenic mice.** (A - D) The TEC (A&B), thymocyte (C) and peripheral T cell subsets (D) of 12-week old WT (black bars) and *Foxn1::Wnt4*<sup>+</sup> mice (open bars) were analysed by flow cytometry. (A) The gating strategy for defining TEC subsets is shown in (A), which depicts UEA-1 and Ly51 staining of gated CD45<sup>+</sup>EpCAM<sup>+</sup> TECs. (B) Proportions of total TECs, together with the various TEC subsets as defined in (A). (C) The total number of thymocytes, and proportions of the various thymocyte subsets are shown.

**Supplementary Table 1. Antibodies and staining reagents for flow cytometry and immunofluorescence**

| <b>Antigen/Reagent</b> | <b>Clone</b>         | <b>Conjugate</b>                | <b>Supplier</b>           |
|------------------------|----------------------|---------------------------------|---------------------------|
| β-catenin              | 14/beta-catenin      | -                               | BD Biosciences            |
| CD3                    | 145-2C11             | APC                             | eBioscience               |
| CD4                    | GK1.5                | FITC                            | BioLegend                 |
| CD8                    | 53-6.7               | PE                              | eBioscience               |
| CD19                   | 1D3                  | PE Cy7                          | eBioscience               |
| CD44                   | 1M7                  | PE                              | BD Bioscience             |
| CD45                   | 30-F11               | PE Cy7                          | BioLegend                 |
| CD62L                  | MEL-14               | FITC                            | eBioscience               |
| CD80                   | 16-10A1              | Biotin                          | BioLegend                 |
| E-cadherin             | Decma-1              | none, Alexa Fluor 647           | eBioscience               |
| EpCAM                  | G8.8                 | APC                             | BioLegend                 |
| Keratin 5              | rabbit polyclonal    | -                               | Covance                   |
| Keratin 8              | Troma-1              | -                               | in house                  |
| Ly51                   | 6C3                  | PE                              | eBioscience               |
| MHC2                   | M5/114.15.2          | FITC                            | BioLegend                 |
| mouse IgG1             | goat polyclonal      | Biotin                          | SouthernBiotech           |
| mouse IgG (H+L)        | rat polyclonal       | FITC                            | Jackson<br>ImmunoResearch |
| rabbit IgG (H+L)       | goat polyclonal      | Alexa Fluor 488                 | Invitrogen                |
| rat IgG (H+L)          | donkey<br>polyclonal | Cy3                             | Jackson<br>ImmunoResearch |
| Streptavidin           | -                    | Cy3, Cy5                        | Jackson<br>ImmunoResearch |
| Streptavidin           | -                    | FITC, PE or Alexa<br>Fluor v450 | eBioscience               |
| UEA-1                  | -                    | Biotin, FITC                    | Vector Laboratories       |
